# Supplementary material for: Long COVID after breakthrough SARS-CoV-2 infection
Source: PubMed Central journal article supplement (PMC9307472; doi:10.1038/s41591-022-01840-0), 2022-05-25

**Supplementary information**

---

**Long COVID after breakthrough SARS-CoV-2 infection**

---

In the format provided by the authors and unedited

## Supplementary Information

### Long COVID after breakthrough SARS-CoV-2 infection

| Table of Contents                                                                                                                                                                                                                                                                                                        | Page        |
|--------------------------------------------------------------------------------------------------------------------------------------------------------------------------------------------------------------------------------------------------------------------------------------------------------------------------|-------------|
| <b>Supplementary Figures</b>                                                                                                                                                                                                                                                                                             |             |
| <b>Supplementary Figure 1:</b> Standardized mean differences between those with breakthrough SARS-CoV-2 infection and the contemporary control group before and after weighting by organ system.                                                                                                                         | 4           |
| <b>Supplementary Figure 2:</b> Standardized mean differences between those with breakthrough SARS-CoV-2 infection that were non-hospitalized, hospitalized, and admitted to the intensive care unit during the acute phase of the disease and the contemporary control group before and after weighting by organ system. | 5           |
| <b>Supplementary Figure 3:</b> Standardized mean differences between those with breakthrough SARS-CoV-2 infection and those with SARS-COV-2 infection without prior vaccination by organ system.                                                                                                                         | 6           |
| <b>Supplementary Figure 4:</b> Standardized mean differences between those with breakthrough SARS-CoV-2 infection and those with SARS-COV-2 infection without prior vaccination that were non-hospitalized, hospitalized, and admitted to the ICU during the acute phase of the disease by organ system.                 | 7           |
| <b>Supplementary Figure 5:</b> Standardized mean differences between those with breakthrough SARS-CoV-2 infection hospitalized during the acute phase of the illness and those hospitalized with seasonal influenza before and after weighting by organ system.                                                          | 8           |
| <b>Supplementary Figure 6:</b> Risk of post-acute sequelae in people who were hospitalized during the acute phase of breakthrough SARS-CoV-2 infection compared to those hospitalized with seasonal influenza                                                                                                            | 9           |
| <b>Supplementary Figure 7:</b> Analytic flowchart                                                                                                                                                                                                                                                                        | 10          |
| <b>Supplementary Figure 8:</b> Cohort flowchart                                                                                                                                                                                                                                                                          | 11          |
| <b>Supplementary Figure 9:</b> Rationale and interpretation of the comparative analyses                                                                                                                                                                                                                                  | 12          |
| <b>Supplementary Tables</b>                                                                                                                                                                                                                                                                                              |             |
| <b>Supplementary Table 1:</b> Demographic and health characteristics of those with breakthrough SARS-CoV-2 infection, SARS-COV-2 infection without prior vaccination, the contemporary control group, the historical control group, and the vaccinated control group before weighting.                                   | Excel sheet |
| <b>Supplementary Table 2:</b> Demographic and health characteristics of those with breakthrough SARS-CoV-2 infection and SARS-COV-2 infection without prior vaccination by immunocompromised status before weighting.                                                                                                    | Excel sheet |
| <b>Supplementary Table 3:</b> Demographic and health characteristics of those with breakthrough SARS-CoV-2 infection by vaccine status before weighting.                                                                                                                                                                 | Excel sheet |
| <b>Supplementary Table 4:</b> Characteristics and standardized mean differences of those with breakthrough SARS-CoV-2 infection, SARS-COV-2 infection without prior vaccination, and the contemporary control group after weighting.                                                                                     | Excel sheet |
| <b>Supplementary Table 5:</b> Risk and 6-month burden of death, at least one post-acute sequela, and post-acute sequelae by organ system in breakthrough SARS-CoV-2 infection compared to the contemporary control group.                                                                                                | Excel sheet |
| <b>Supplementary Table 6:</b> Risk of post-acute sequelae in breakthrough SARS-CoV-2 infection compared to the contemporary control group.                                                                                                                                                                               | Excel sheet |
| <b>Supplementary Table 7:</b> Risk and 6-month burden of death, at least one post-acute sequela, and post-acute sequelae by organ system in breakthrough SARS-CoV-2 infection compared to the historical control group.                                                                                                  | Excel sheet |
| <b>Supplementary Table 8:</b> Risk and 6-month burden of death, at least one post-acute sequela, and post-acute sequelae by organ system in breakthrough SARS-CoV-2 infection compared to the vaccinated control group.                                                                                                  | Excel sheet |

|                                                                                                                                                                                                                                                                                                                    |             |
|--------------------------------------------------------------------------------------------------------------------------------------------------------------------------------------------------------------------------------------------------------------------------------------------------------------------|-------------|
| <b>Supplementary Table 9:</b> Risk and burden of death, at least one post-acute sequela, and post-acute sequelae by organ system in breakthrough SARS-CoV-2 infection compared to the contemporary control group in the first 30-90, and 91-180, days of follow-up.                                                | Excel sheet |
| <b>Supplementary Table 10:</b> Risk and 6-month burden of death, at least one post-acute sequela, and post-acute sequelae by organ system in those with breakthrough SARS-CoV-2 infection by immunocompromised status.                                                                                             | Excel sheet |
| <b>Supplementary Table 11:</b> Risk and 6-month burden of death, at least one post-acute sequela, and post-acute sequelae by organ system in breakthrough SARS-CoV-2 infection by vaccination type.                                                                                                                | Excel sheet |
| <b>Supplementary Table 12:</b> Demographic and health characteristics of those with breakthrough SARS-CoV-2 infection by care setting of the acute phase before weighting before weighting.                                                                                                                        | Excel sheet |
| <b>Supplementary Table 13:</b> Characteristics and standardized mean differences of those with breakthrough SARS-CoV-2 infection by care setting of the acute phase of the disease compared to the contemporary control group after weighting.                                                                     | Excel sheet |
| <b>Supplementary Table 14:</b> Risk and 6-month burden of death, at least one post-acute sequela, and post-acute sequelae by organ system in those with breakthrough SARS-CoV-2 infection compared to the contemporary control group by care setting of the acute phase of the disease.                            | Excel sheet |
| <b>Supplementary Table 15:</b> Risk of post-acute sequelae in those with breakthrough SARS-CoV-2 infection compared to the contemporary control group by care setting of the acute phase of the disease.                                                                                                           | Excel sheet |
| <b>Supplementary Table 16:</b> Demographic and health characteristics of those with SARS-COV-2 infection without prior vaccination by care setting of the acute phase before weighting.                                                                                                                            | Excel sheet |
| <b>Supplementary Table 17:</b> Characteristics and standardized mean differences of those with breakthrough SARS-CoV-2 infection and SARS-COV-2 infection without prior vaccination by care setting of the acute phase of the disease after weighting.                                                             | Excel sheet |
| <b>Supplementary Table 18:</b> Risk and 6-month burden of death, at least one post-acute sequela, and post-acute sequelae by organ system in breakthrough SARS-CoV-2 infection compared to those with SARS-COV-2 infection without prior vaccination.                                                              | Excel sheet |
| <b>Supplementary Table 19:</b> Risk of post-acute sequelae in breakthrough SARS-CoV-2 infection compared to those with SARS-COV-2 infection without prior vaccination.                                                                                                                                             | Excel sheet |
| <b>Supplementary Table 20:</b> Risk and 6-month burden of death, at least one post-acute sequela, and post-acute sequelae by organ system in those with breakthrough SARS-CoV-2 infection compared to those with SARS-COV-2 infection without prior vaccination by immunocompromised status.                       | Excel sheet |
| <b>Supplementary Table 21:</b> Risk and 6-month burden of death, at least one post-acute sequela, and post-acute sequelae by organ system in those with breakthrough SARS-CoV-2 infection compared to those with SARS-COV-2 infection without prior vaccination by care setting of the acute phase of the disease. | Excel sheet |
| <b>Supplementary Table 22:</b> Demographic and health characteristics of those hospitalized with breakthrough SARS-CoV-2 infection and seasonal influenza before weighting.                                                                                                                                        | Excel sheet |
| <b>Supplementary Table 23:</b> Characteristics and standardized mean differences of those with breakthrough SARS-CoV-2 infection hospitalized during the acute phase of the disease compared to those hospitalized with seasonal influenza after weighting.                                                        | Excel sheet |
| <b>Supplementary Table 24:</b> Risk and 6-month burden of death, at least one post-acute sequela, and post-acute sequelae by organ system in breakthrough SARS-CoV-2 infection hospitalized during the acute phase compared to those hospitalized with seasonal influenza.                                         | Excel sheet |
| <b>Supplementary Table 25:</b> Risk of post-acute sequelae in breakthrough SARS-CoV-2 infection hospitalized during the acute phase compared to those hospitalized with seasonal influenza.                                                                                                                        | Excel sheet |



**Supplementary Figure 1:** Standardized mean differences between those with breakthrough SARS-CoV-2 infection and the contemporary control group before and after weighting by organ system.

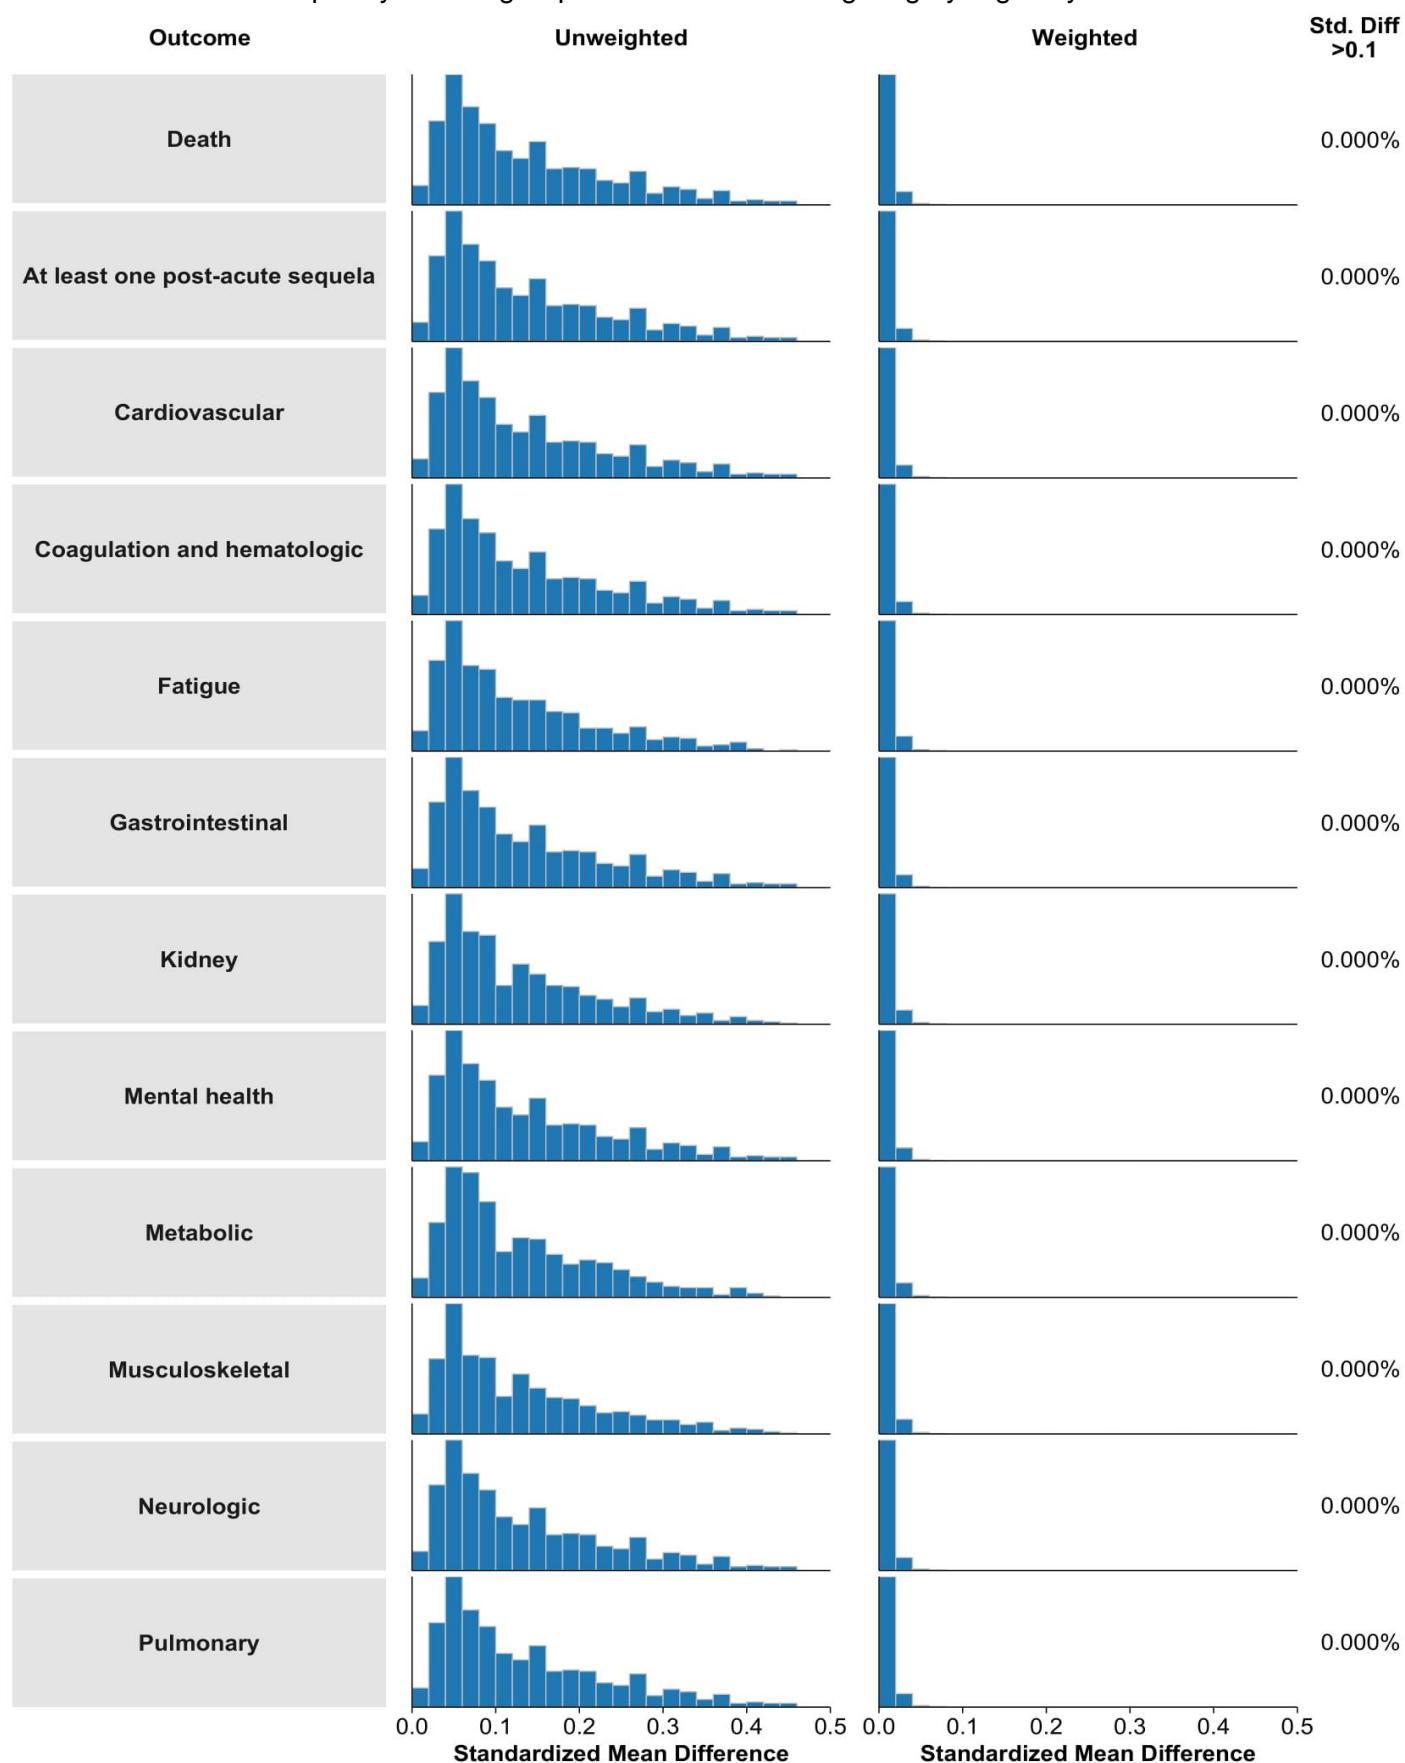

**Supplementary Figure 2:** Standardized mean differences between those with breakthrough SARS-CoV-2 infection that were non-hospitalized, hospitalized, and admitted to the intensive care unit during the acute phase of the disease and the contemporary control group before and after weighting by organ system.

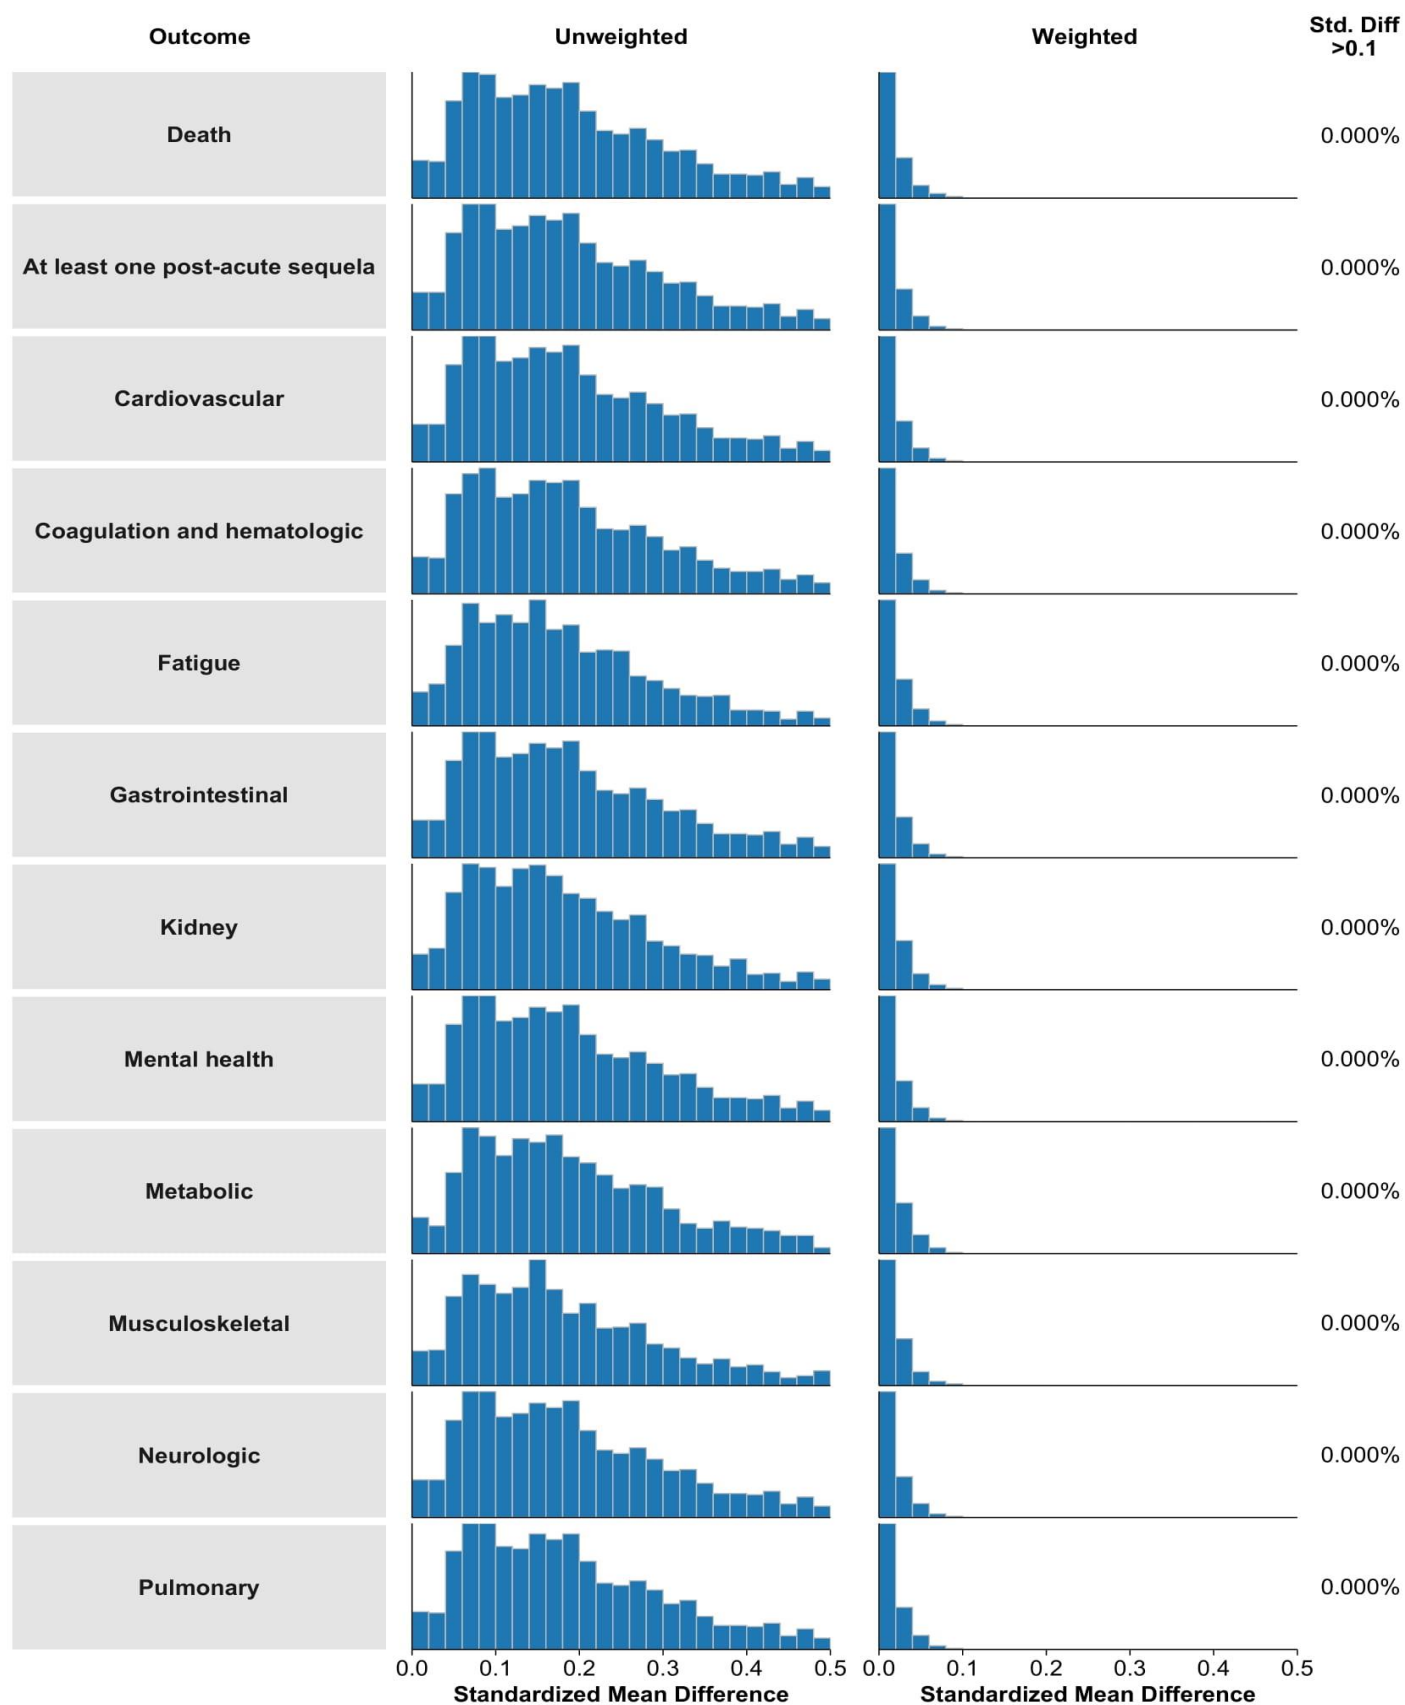

**Supplementary Figure 3:** Standardized mean differences between those with breakthrough SARS-CoV-2 infection and those with SARS-CoV-2 infection without prior vaccination by organ system.

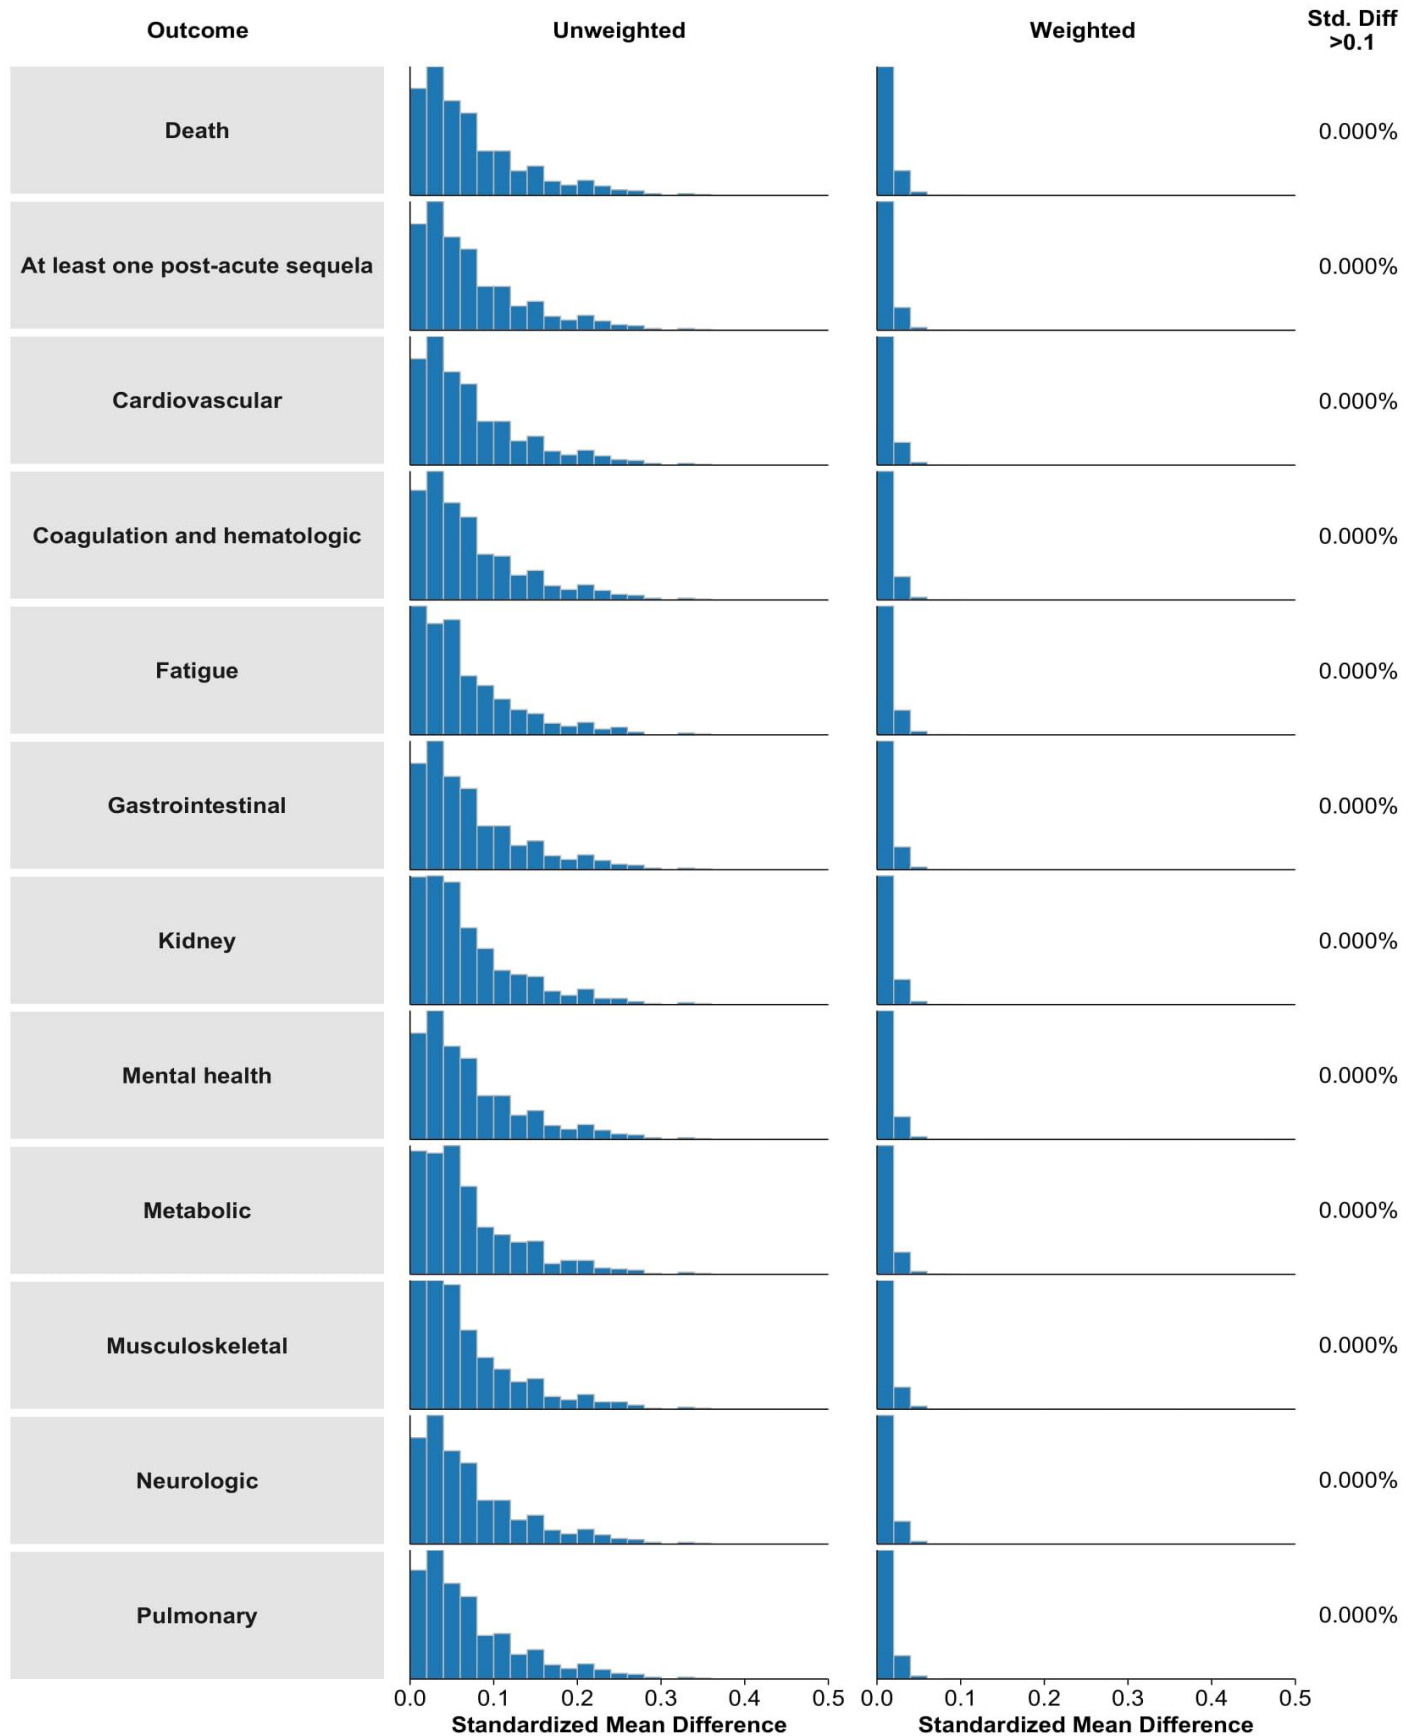

**Supplementary Figure 4:** Standardized mean differences between those with breakthrough SARS-CoV-2 infection and those with SARS-CoV-2 infection without prior vaccination that were non-hospitalized, hospitalized, and admitted to the ICU during the acute phase of the disease by organ system.

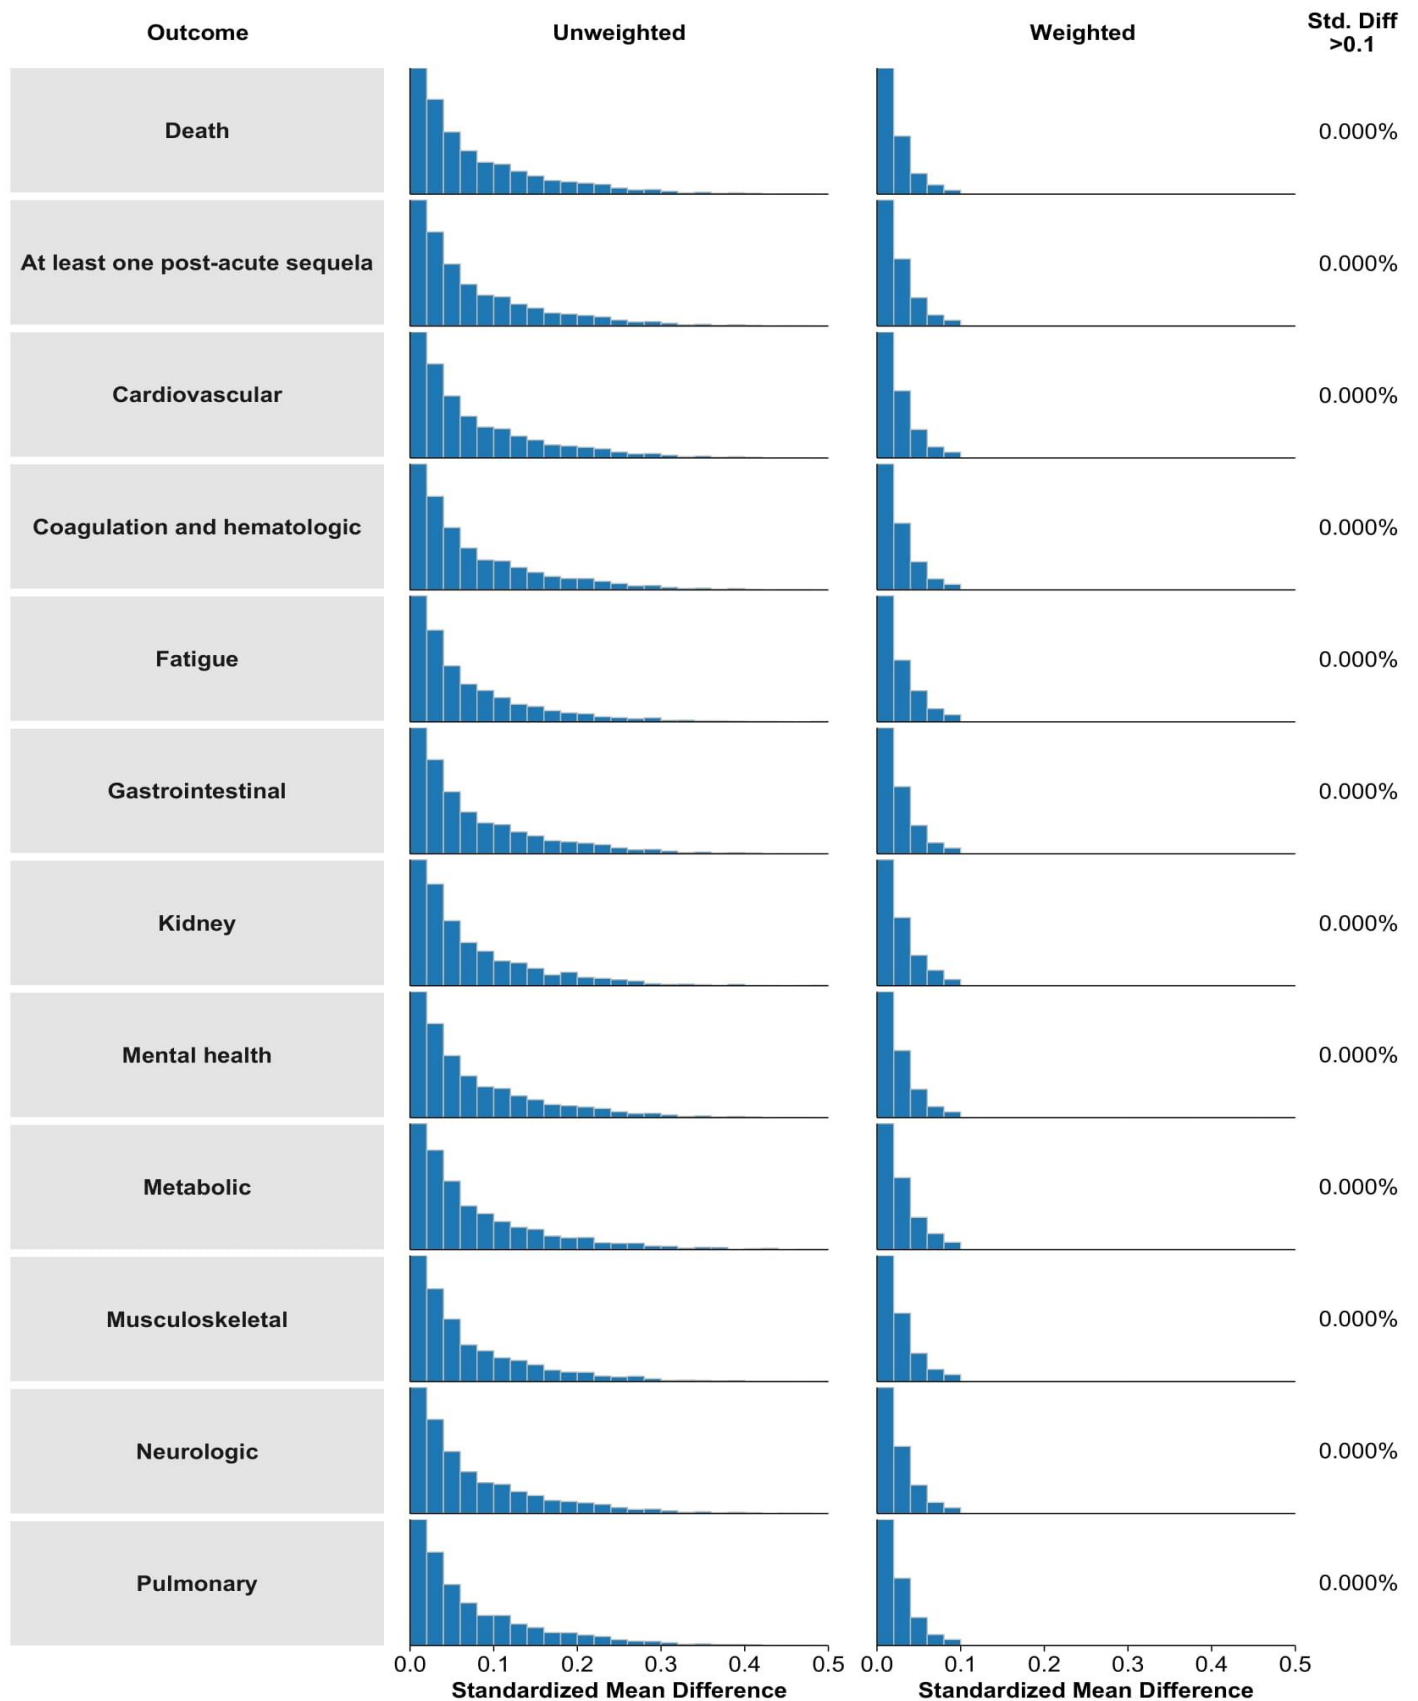



**Supplementary Figure 5:** Standardized mean differences between those with breakthrough SARS-CoV-2 infection hospitalized during the acute phase of the illness and those hospitalized with seasonal influenza before and after weighting by organ system.

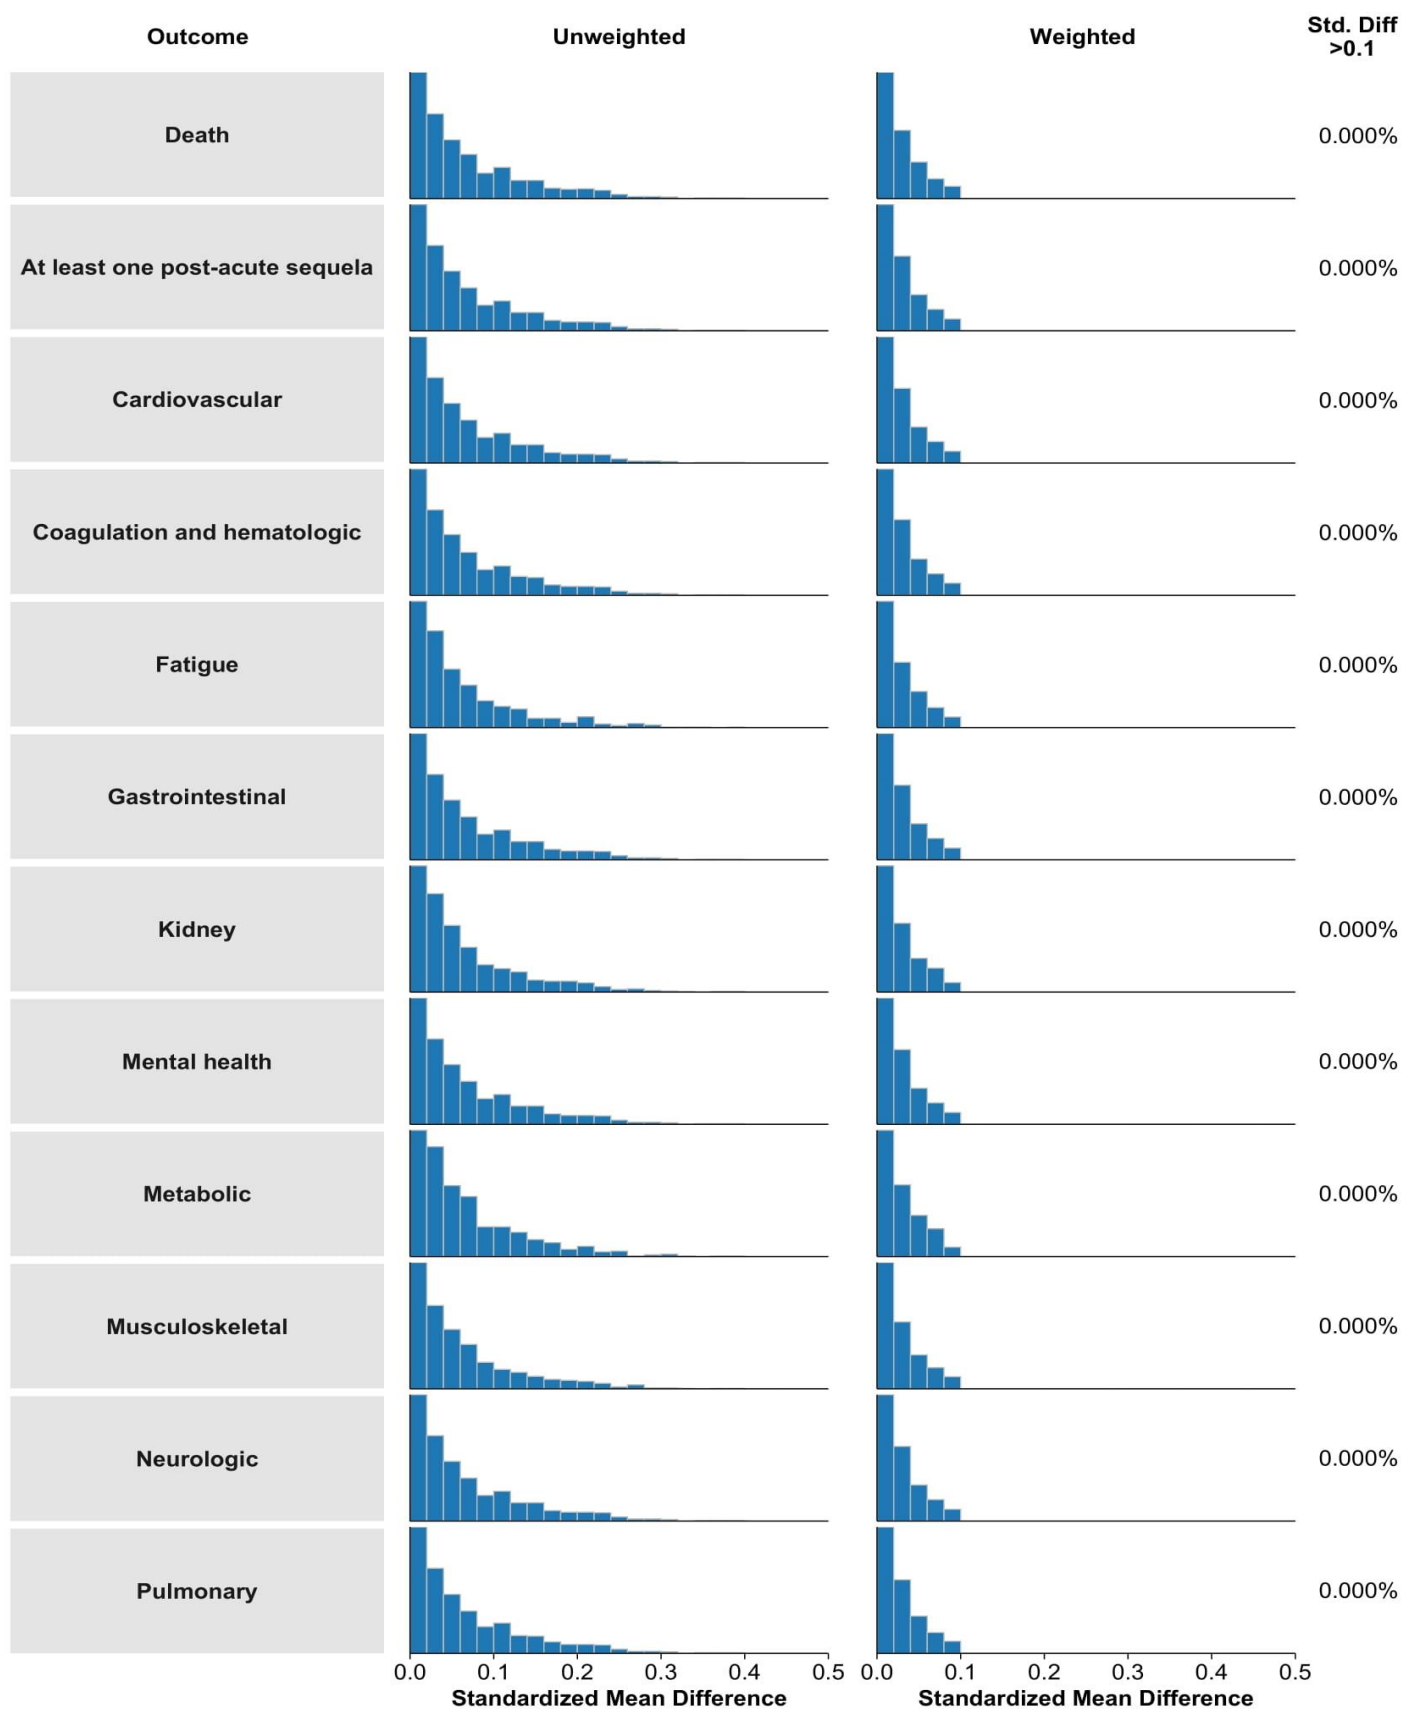

**Supplementary Figure 6: Risk of post-acute sequelae in people who were hospitalized during the acute phase of breakthrough SARS-CoV-2 infection compared to those hospitalized with seasonal influenza.**

Incident outcomes were assessed from 30 days after the positive SARS-CoV-2 infection test to end of follow-up. Results are in comparison of those hospitalized with breakthrough SARS-CoV-2 infection (n=3,667) to those hospitalized with seasonal influenza (n=14,337). Adjusted hazard ratios (dots) and 95% confidence intervals (error bars) are presented. Outcomes that occurred in less than 10 participants in a group were excluded.

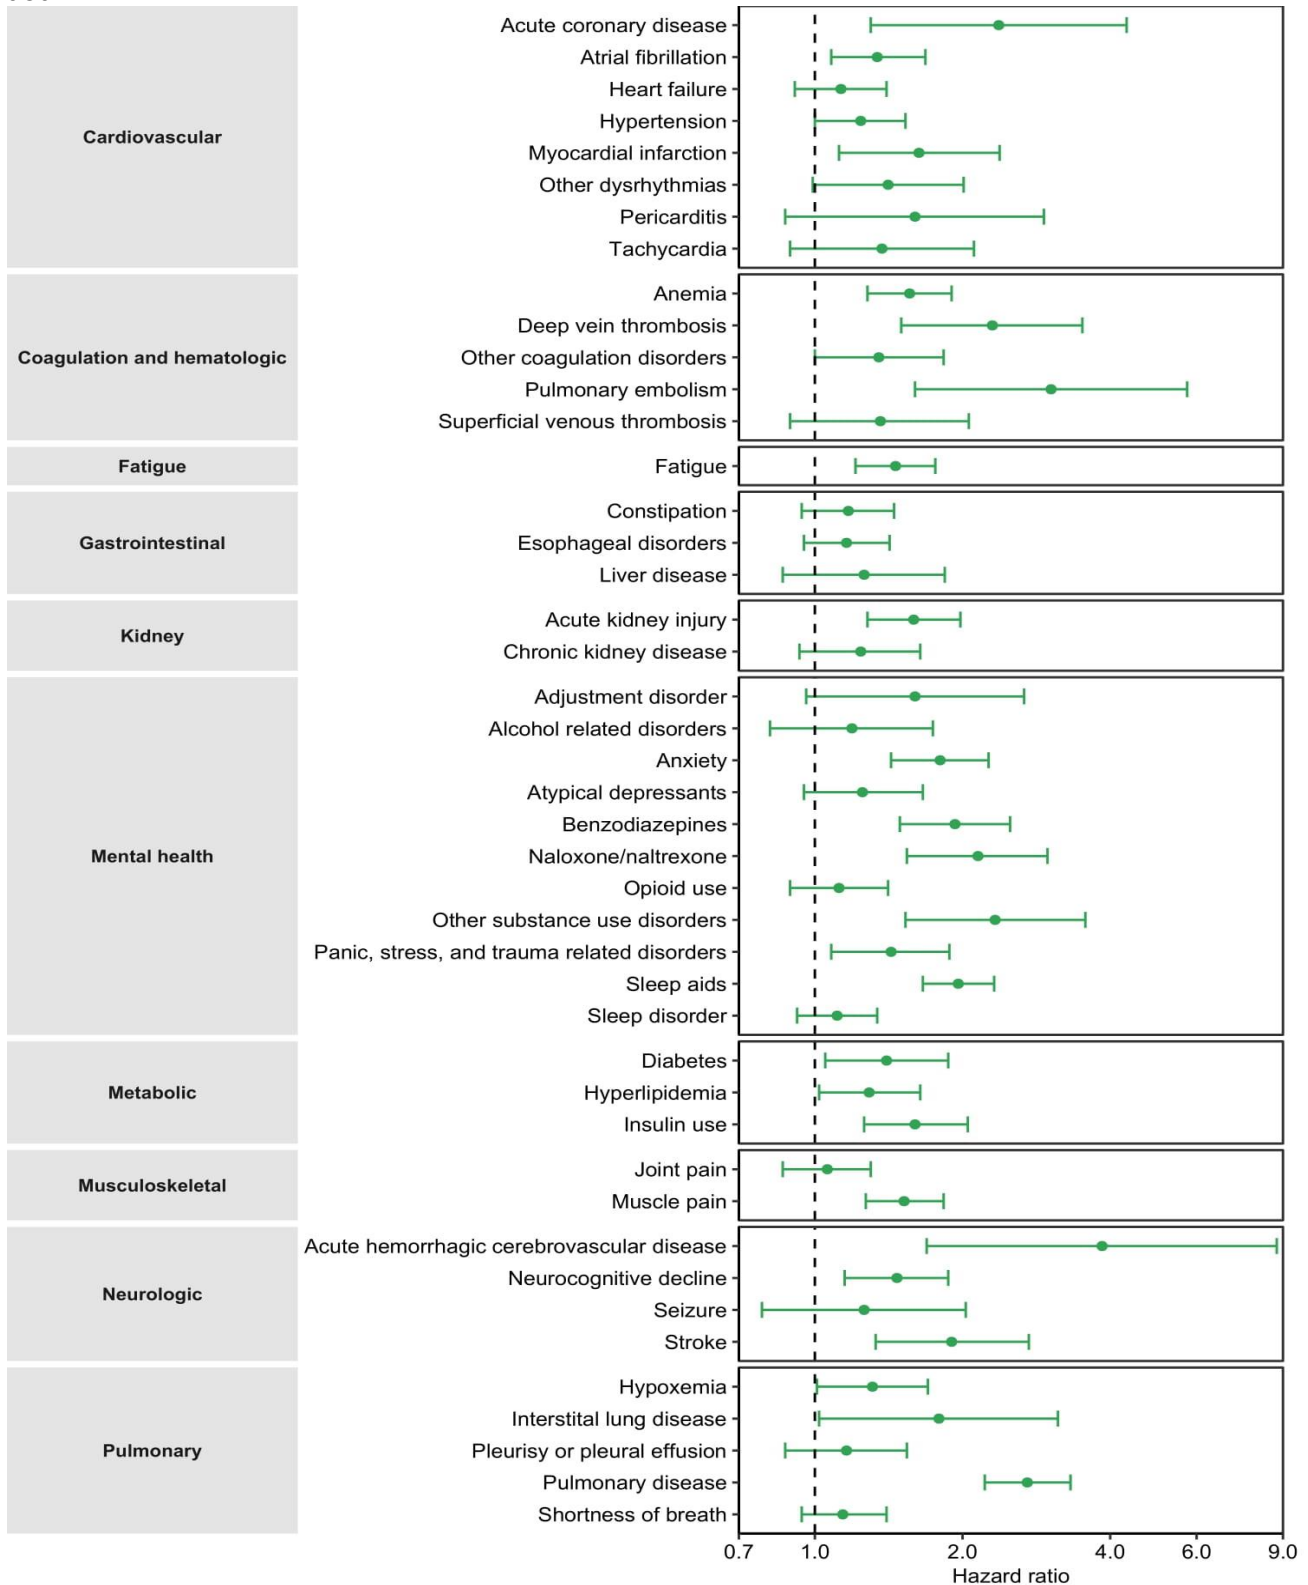

Supplementary Figure 7: Analytic flowchart.

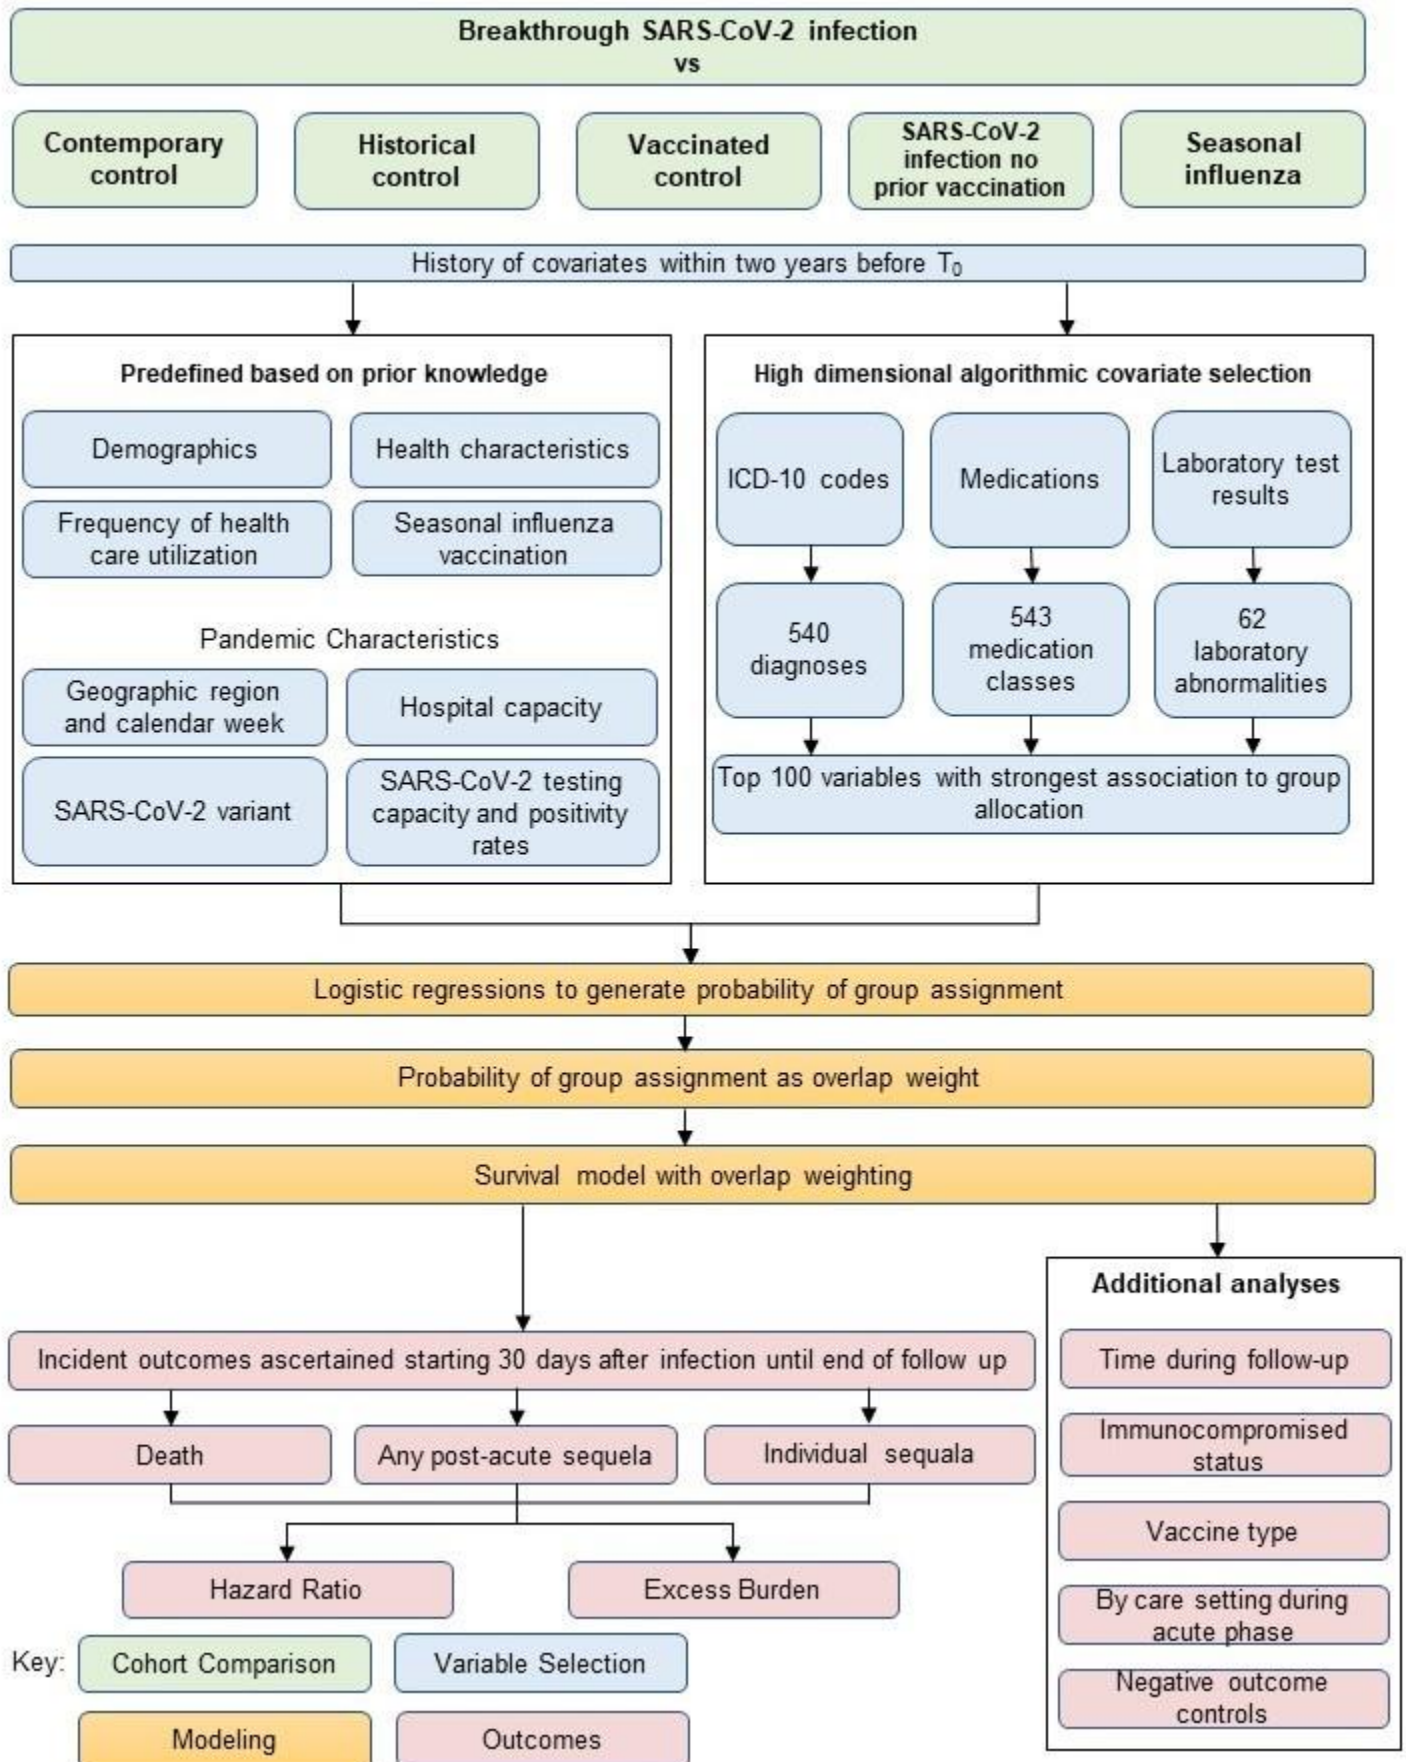

**Supplementary Figure 8: Cohort flowchart.**

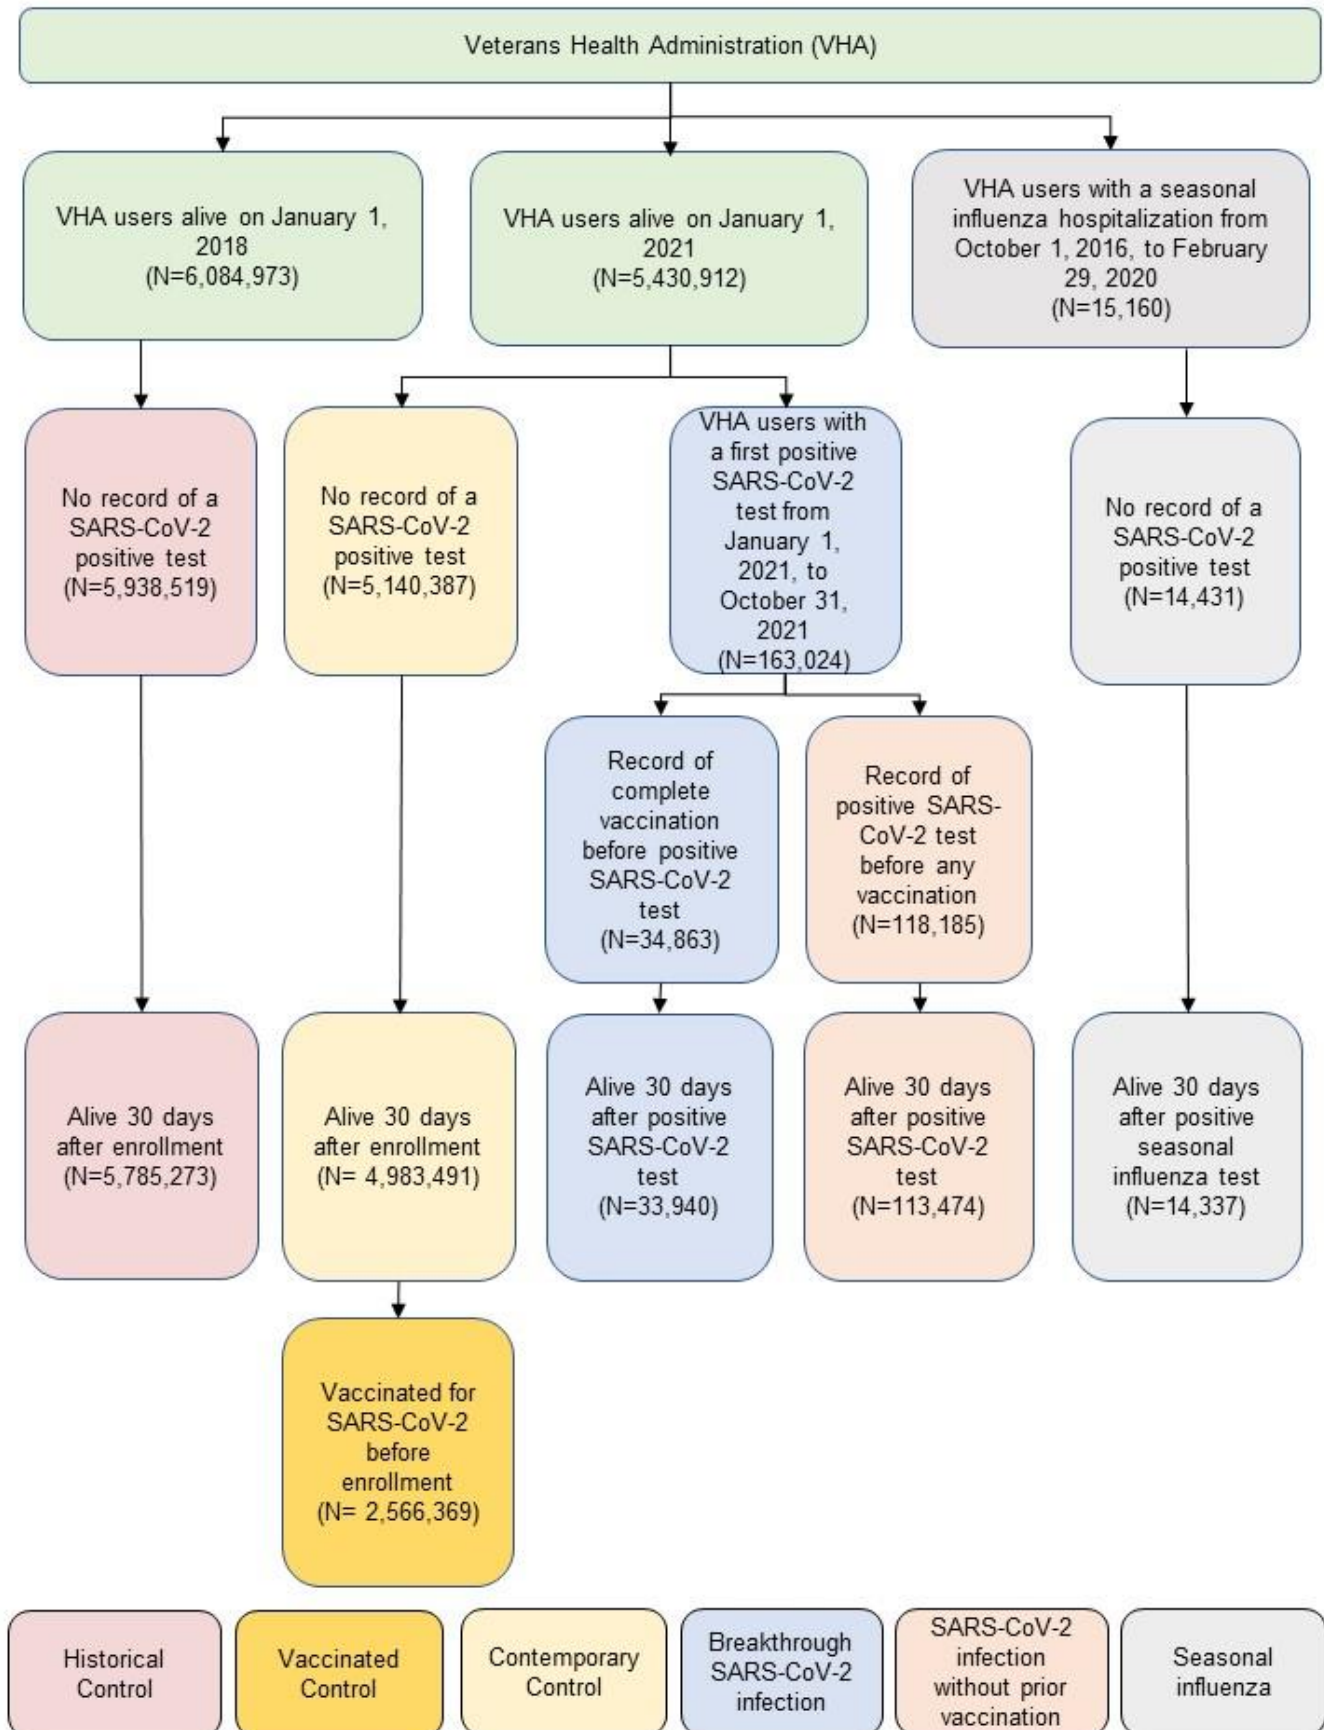

**Supplementary Figure 9:** Rationale and interpretation of the comparative analyses

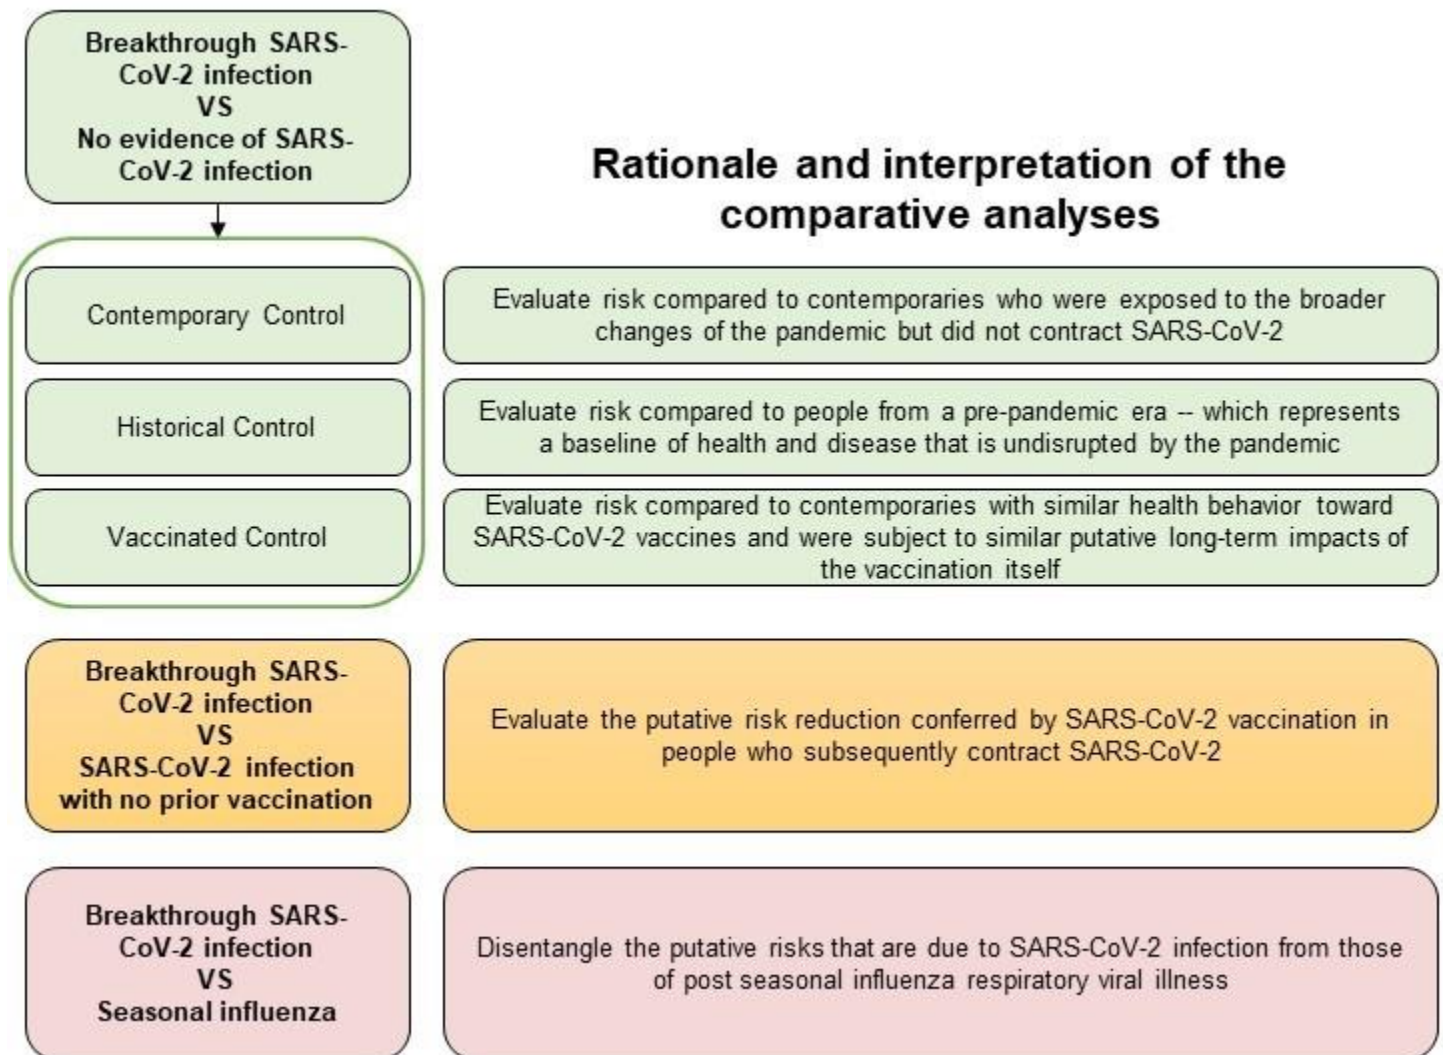

Supplement: 41591_2022_1840_MOESM1_ESM.pdf [file 41591_2022_1840_MOESM1_ESM.pdf]
